# Supplementary material for: High electromagnetic adsorption at radiofrequency by impedance matched carbon nanotube composites
Source: Royal Society of Chemistry journal article supplement (doi:10.1039/b807777k), 2008-01-01
Supplement: b807777k.pdf [file b807777k.pdf]

**Supplementary file**

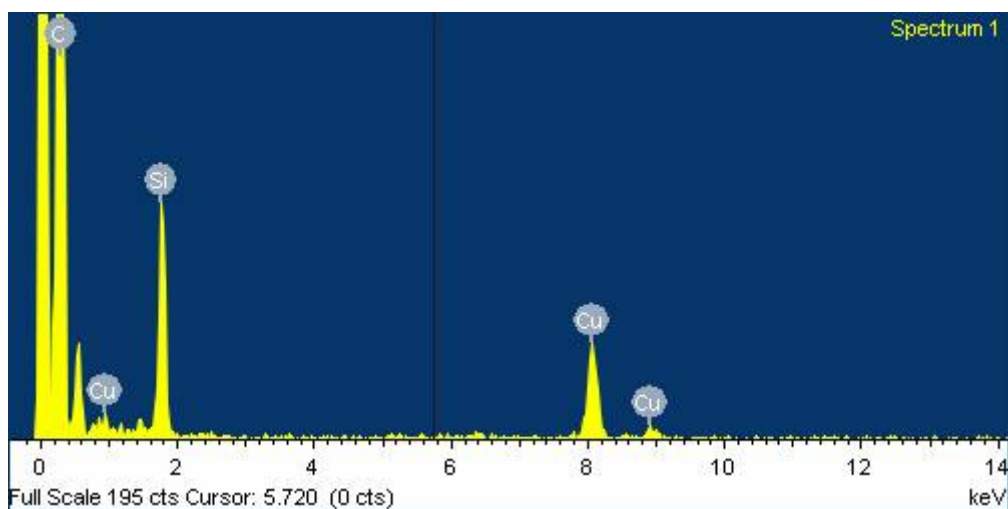

EDX spectrum of acid treated carbon nanotubes. The Si and Cu signals arise from the holey supported film and Fe at. % is less than 0.1. Spectrum was obtained at energy counts = 100,000 with  $\pm 2$  % error.
